# Supplementary material
Source: PubMed Central journal article supplement (PMC5516900)

**Supplementary Fig. 1 – (a) A representative sampled lesion of clear cell renal cell carcinoma stained with hematoxylin and eosin. Immunohistochemical staining demonstrated localization of (b) prostate-specific membrane antigen to (c) CD34-positive endothelial cells. All images were taken at  $\times 200$ .**

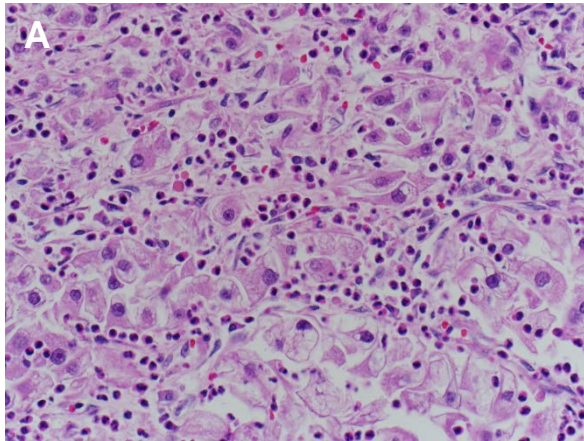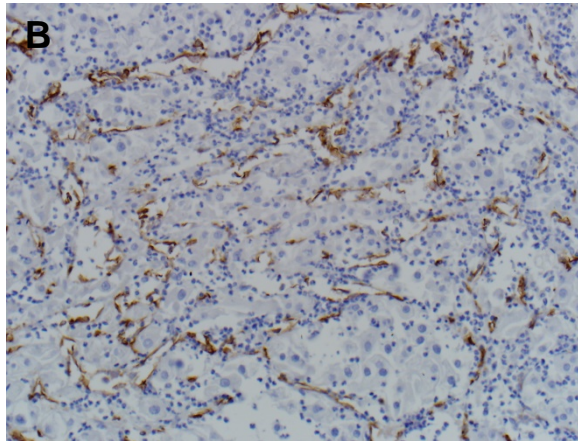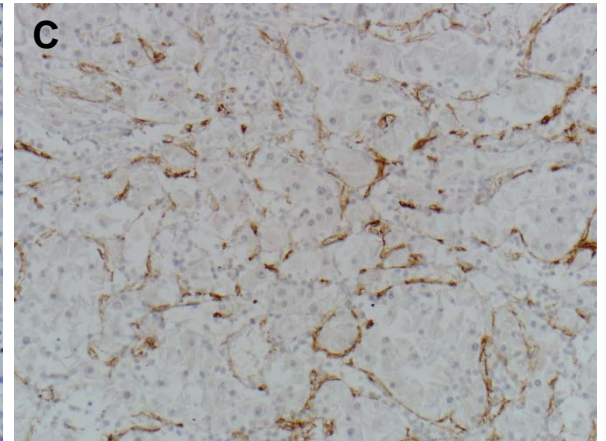

**Supplementary Fig. 2 – (a) Fused axial  $^{18}\text{F}$ -DCFPyL positron emission tomography/computed tomography image demonstrating a site of discrete radiotracer uptake in the right sixth rib. (b) Histologically, no cancer was observed; however, marked edema of the marrow space was present ( $\times 40$ ), suggesting the possibility that cancer may have been missed due to undersampling.**

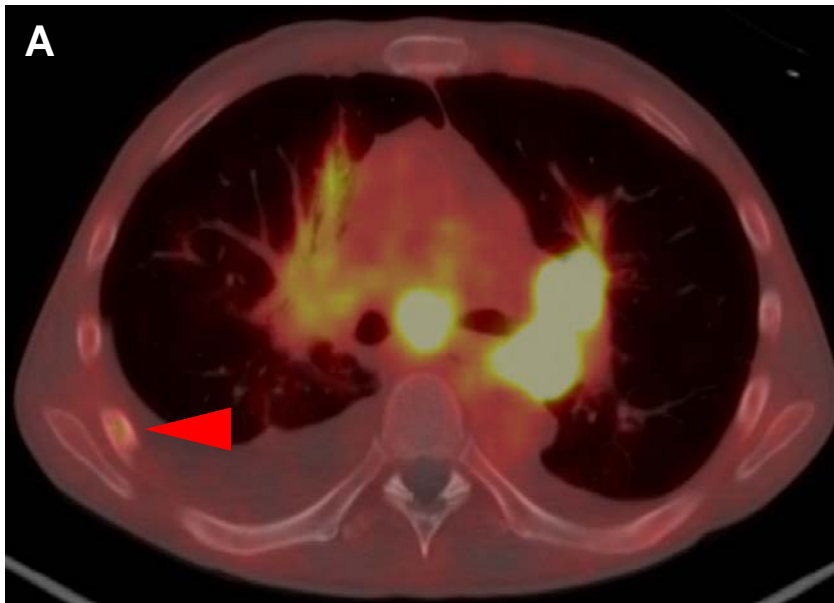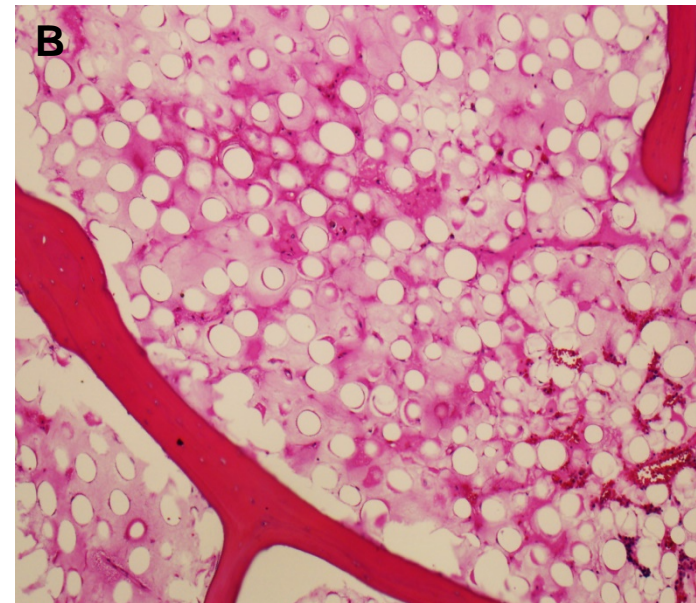

**Supplementary Fig. 3 – (a) Fused axial  $^{18}\text{F}$ -DCFPyL positron emission tomography/computed tomography image demonstrating a pathologically enlarged left inguinal lymph node without radiotracer uptake. (b) Gross and (c) microscopic ( $\times 400$ ) examination of the node demonstrated necrotic tumor.**

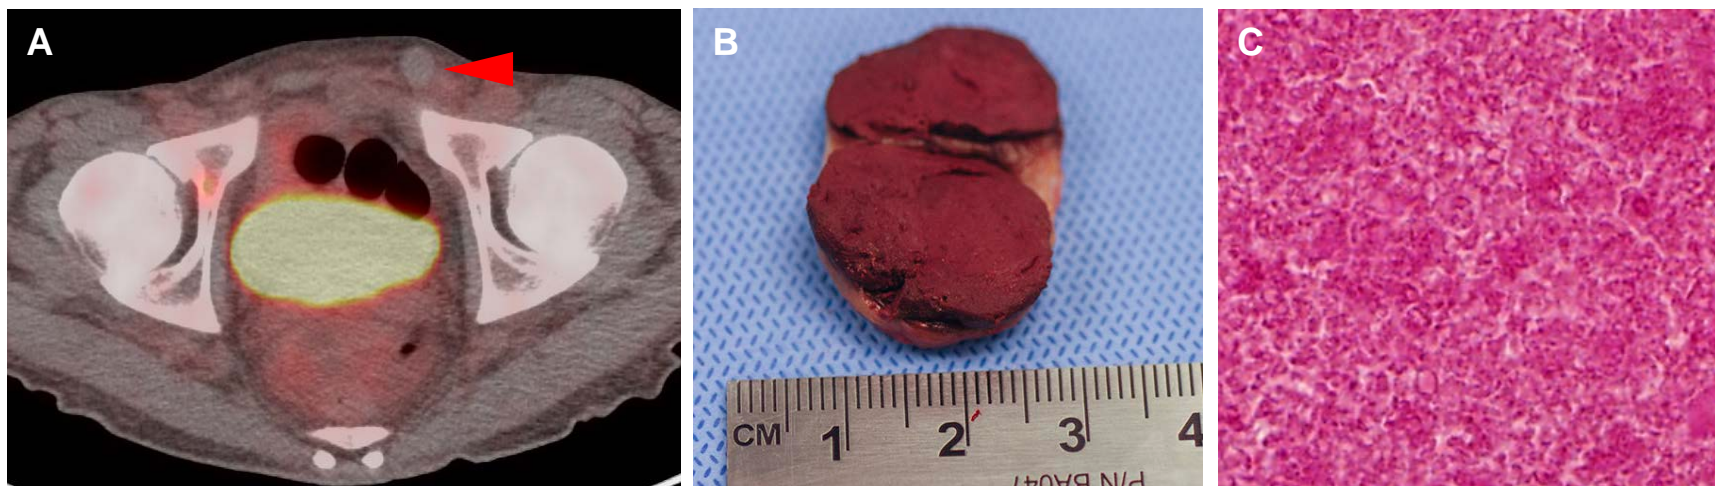

Supplement: NIHMS865435-supplement-Suppl_data.pdf [file NIHMS865435-supplement-Suppl_data.pdf]
